# Supplementary material
Source: publisher figshare collection journal article supplement (https://gsajournals.figshare.com/ndownloader/files/14331764)
Supplement: Supplementary file 1 [file 14331764]

## Sheet: Novel lincRNA vs Bovine
Supplementary File S4. Results of syntenic analysis of novel lincRNAs against different species.
Left-Right_Genes	Novel lincRNA	Bovine_lincRNA
A1BG-RPS5	lincRNA.8105	NONBTAG019566.1
ACSBG1-DNAJA4	lincRNA.10536	NONBTAG020195.1
ACSL1-HELT	lincRNA.18018	NONBTAG010927.2
ADCY5-HACD2	lincRNA.1877	NONBTAG000459.2
ADRB1-CCDC186	lincRNA.15956	NONBTAG010749.2
ADTRP-TMEM170B	lincRNA.14677	NONBTAG009750.2
AGPS-NFE2L2	lincRNA.12977	NONBTAG007148.2
AKR1E2-KLF6	lincRNA.6055	NONBTAG018805.1
ANKRD1-PCGF5	lincRNA.15678	NONBTAT015971.2
AREG-BTC	lincRNA.23851	NONBTAG015093.2
ARID1A-RPS6KA1	lincRNA.13814	NONBTAG008017.2
ARMC1-MTFR1	lincRNA.26409	NONBTAG004282.2
ATP12A-PCDH9	lincRNA.3060	NONBTAG003178.2
BDH1-APOD	lincRNA.1951	NONBTAG000532.2
BOD1L1-C1QTNF7	lincRNA.23997	NONBTAG015210.2
BPTF-NOL11	lincRNA.4501	NONBTAG006935.2
C1QTNF2-ZBED8	lincRNA.23190	NONBTAG015701.2
CCM2-MYO1G	lincRNA.21492	NONBTAG013279.2
CCND2-PARP11	lincRNA.20631	NONBTAG014387.2
CD109-COL12A1	lincRNA.25403	NONBTAG016743.2
CD55-CR2	lincRNA.4920	NONBTAG005225.2
CDH7-SERPINB8	lincRNA.16215	NONBTAG009890.2
CDON-RPUSD4	lincRNA.15036	NONBTAG011634.2
CHD2-FAM174B	lincRNA.10367	NONBTAG008585.2
CHI3L1-BTG2	lincRNA.4831	NONBTAT007494.2
CHP1-OIP5	lincRNA.24664	NONBTAG001469.2
CLIC4-SRRM1	lincRNA.13859	NONBTAG008028.2
CREBL2-DUSP16	lincRNA.20485	NONBTAG014318.2
CSMD3-KCNV1	lincRNA.26538	NONBTAG004425.2
DCN-BTG1	lincRNA.19607	NONBTAG013758.2
DOCK9-UBAC2	lincRNA.3173	NONBTAG003366.2
DUSP6-POC1B	lincRNA.19585	NONBTAG013745.2
DYNLRB2-CDYL2	lincRNA.6776	NONBTAG006167.2
ECE1-EIF4G3	lincRNA.13927	NONBTAG008064.2
EED-PICALM	lincRNA.14875	NONBTAG011533.2
EIF2D-DYRK3	lincRNA.4904	NONBTAG019315.1
EPB41-OPRD1	lincRNA.13735	NONBTAG007983.2
ERCC4-MKL2	lincRNA.16882	NONBTAG010281.2
EXO1-WDR64	lincRNA.5107	NONBTAG005360.2
FAM92A-TRIQK	lincRNA.26683	NONBTAG004536.2
FAT1-ZFP42	lincRNA.18041	NONBTAG010952.2
FAT3-CHORDC1	lincRNA.14834	NONBTAG011502.2
FBXL18-TNRC18	lincRNA.17412	NONBTAG020703.2
FGF18-SMIM23	lincRNA.8988	NONBTAG008109.2
FOXO1-COG6	lincRNA.2890	NONBTAG003020.2
FYN-TRAF3IP2	lincRNA.25556	NONBTAG016908.2
GNAI1-PHTF2	lincRNA.21204	NONBTAG012947.2
GRHL2-ZNF706	lincRNA.26591	NONBTAG004471.2
GRM7-EDEM1	lincRNA.11261	NONBTAG009062.2
HES1-OPA1	lincRNA.1974	NONBTAG018144.1
HTR1E-SYNCRIP	lincRNA.25704	NONBTAG017106.2
HTR1F-CGGBP1	lincRNA.1646	NONBTAG000206.2
IL6-FAM126A	lincRNA.21139	NONBTAG021294.1
IRF1-SLC22A5	lincRNA.22613	NONBTAG015327.2
IRX3-IRX5	lincRNA.6986	NONBTAG006254.2
KHDRBS3-ZFAT	lincRNA.26218	NONBTAG004124.2
KLF12-TBC1D4	lincRNA.3081	NONBTAG003232.2
KLHL6-MCF2L2	lincRNA.2084	NONBTAG000650.2
LBP-RALGAPB	lincRNA.6505	NONBTAG003998.2
LPP-BCL6	lincRNA.2007	NONBTAG000589.2
LRRC74A-IRF2BPL	lincRNA.25280	NONBTAG002013.2
MAML3-MGST2	lincRNA.9583	NONBTAG005820.2
MAP2K4-MYOCD	lincRNA.3942	NONBTAG006743.2
MBOAT1-RNF144B	lincRNA.14627	NONBTAG009702.2
MEDAG-ALOX5AP	lincRNA.2940	NONBTAG018747.1
MEIS3-SLC8A2	lincRNA.7671	NONBTAG006456.2
MEOX2-ISPD	lincRNA.21108	NONBTAG012834.2
METTL8-TLK1	lincRNA.13035	NONBTAG007221.2
MKKS-SLX4IP	lincRNA.5699	NONBTAG003463.2
MKL2-PARN	lincRNA.16879	NONBTAG010283.2
MORC2-SMTN	lincRNA.10112	NONBTAT008893.2
NDUFV3-PKNOX1	lincRNA.2543	NONBTAG001108.2
NOX5-GLCE	lincRNA.24377	NONBTAG001340.2
NR2C2-FGD5	lincRNA.11710	NONBTAG009399.2
OTUD7A-ADAMTS7	lincRNA.10527	NONBTAG008661.2
PARD3-NRP1	lincRNA.5826	NONBTAG003588.2
PDS5B-N4BP2L1	lincRNA.2930	NONBTAG003081.2
POC1A-DUSP7	lincRNA.11468	NONBTAG020343.1
PRSS12-NDST3	lincRNA.23423	NONBTAG014517.2
PYGL-TRIM9	lincRNA.24748	NONBTAG001537.2
RCC1-PHACTR4	lincRNA.13754	NONBTAG007996.2
RREB1-LY86	lincRNA.14727	NONBTAG009792.2
SCAF8-TIAM2	lincRNA.25882	NONBTAG017341.2
SEC31A-THAP9	lincRNA.23924	NONBTAG015143.2
SETBP1-SLC14A2	lincRNA.16443	NONBTAG010080.2
SETD1B-RHOF	lincRNA.9814	NONBTAT031927.1
SLC25A26-MAGI1	lincRNA.11325	NONBTAG009185.2
SLC25A32-CTHRC1	lincRNA.26571	NONBTAG019080.1
SLC25A33-SPSB1	lincRNA.5232	NONBTAG005431.2
SLC25A53-FAM199X	lincRNA.27816	NONBTAG017657.2
SLC38A9-PLPP1	lincRNA.9146	NONBTAG008265.2
SLC40A1-WDR75	lincRNA.12893	NONBTAG007075.2
SLCO6A1-PAM	lincRNA.23328	NONBTAG015892.2
SLITRK5-GPC5	lincRNA.3133	NONBTAG003293.2
SMIM14-UBE2K	lincRNA.23696	NONBTAG021669.1
SQLE-ZNF572	lincRNA.26302	NONBTAG004151.2
SQSTM1-MGAT4B	lincRNA.21958	NONBTAG021820.1
SRC-BLCAP	lincRNA.6473	NONBTAG018955.1
SUCNR1-AADAC	lincRNA.2330	NONBTAG000935.2
TANK-RBMS1	lincRNA.13090	NONBTAG007310.2
TBC1D5-SATB1	lincRNA.2692	NONBTAG001166.2
TCF20-NFAM1	lincRNA.20818	NONBTAG021650.1
TENM1-PRR32	lincRNA.27650	NONBTAG017502.2
TET1-CCAR1	lincRNA.17714	NONBTAG020838.1
TMCC1-PLXND1	lincRNA.11676	NONBTAG009385.2
TP53TG5-DBNDD2	lincRNA.6561	NONBTAG018963.1
TRAF3IP2-REV3L	lincRNA.25558	NONBTAG016914.2
TRPM1-APBA2	lincRNA.10510	NONBTAG020194.1
TSGA13-MKLN1	lincRNA.21656	NONBTAG021373.1
TWF1-IRAK4	lincRNA.19878	NONBTAT020809.2
TXNL1-WDR7	lincRNA.16531	NONBTAT015292.2
ZC3H12C-RDX	lincRNA.8227	NONBTAG004721.2
ZEB2-GTDC1	lincRNA.13175	NONBTAG007444.2
ZKSCAN1-AZGP1	lincRNA.17323	NONBTAG010458.2
ZMIZ1-PPIF	lincRNA.17853	NONBTAG011418.2
ZNF35-ZNF502	lincRNA.11220	NONBTAG009043.2
ZNF383-ZNF527	lincRNA.7359	NONBTAG006414.2
ZNF404-ZNF45	lincRNA.7550	NONBTAG006437.2
ZNF516-TSHZ1	lincRNA.16164	NONBTAG009852.2
ZNF706-YWHAZ	lincRNA.26598	NONBTAG004473.2
ZNF770-DPH6	lincRNA.24600	NONBTAG001435.2
ZNF804A-NUP35	lincRNA.12929	NONBTAG007089.2

## Sheet: Novel lincRNA vs Human
Supplementary File S4. Results of syntenic analysis of novel lincRNAs against different species.
Left-Right_Genes	Novel lincRNA	Human_lincRNA
ACACA-C17orf78	lincRNA.3473	NONHSAG073638.1
ACSBG1-DNAJA4	lincRNA.10536	NONHSAT047550.2
ACSL1-HELT	lincRNA.18018	NONHSAG039501.2
ADCY5-HACD2	lincRNA.1877	NONHSAG084916.1
ADRA2A-GPAM	lincRNA.15925	NONHSAG060820.1
ADRB1-CCDC186	lincRNA.15956	NONHSAG006912.2
ANKRD1-PCGF5	lincRNA.15678	NONHSAG105894.1
AREG-BTC	lincRNA.23851	NONHSAG111822.1
ARMC1-MTFR1	lincRNA.26409	NONHSAG114087.1
BCL2L11-ANAPC1	lincRNA.19492	NONHSAG028937.2
C1orf87-NFIA	lincRNA.530	NONHSAT149042.1
C1QTNF2-ZBED8	lincRNA.23190	NONHSAG091339.1
CCNE1-URI1	lincRNA.7198	NONHSAG076768.1
CD109-COL12A1	lincRNA.25403	NONHSAG093334.1
CD55-CR2	lincRNA.4920	NONHSAT150389.1
CD6-CD5	lincRNA.15088	NONHSAG106506.1
CD80-ADPRH	lincRNA.1808	NONHSAG035847.2
CDKN2C-C1orf185	lincRNA.412	NONHSAG057772.1
CDON-RPUSD4	lincRNA.15036	NONHSAG009974.2
CHP1-OIP5	lincRNA.24664	NONHSAG108011.1
CRYGN-RHEB	lincRNA.21895	NONHSAG049177.2
DCN-BTG1	lincRNA.19607	NONHSAG066556.1
DICER1-CLMN	lincRNA.10830	NONHSAG015787.2
DOCK9-UBAC2	lincRNA.3173	NONHSAG107411.1
DPH5-S1PR1	lincRNA.839	NONHSAG002226.2
DUSP6-POC1B	lincRNA.19585	NONHSAT162534.1
DYNLRB2-CDYL2	lincRNA.6776	NONHSAT143891.2
EHD1-ATG2A	lincRNA.15263	NONHSAG062863.1
EIF2D-DYRK3	lincRNA.4904	NONHSAG004093.2
ERCC4-MKL2	lincRNA.16882	NONHSAG018658.2
ERMARD-DLL1	lincRNA.26021	NONHSAG113443.1
FAT1-ZFP42	lincRNA.18041	NONHSAG039548.2
FGF18-SMIM23	lincRNA.8988	NONHSAG090683.2
GADD45G-DIRAS2	lincRNA.12030	NONHSAT132973.2
GDAP1-PI15	lincRNA.26467	NONHSAT127287.2
GEMIN8-GLRA2	lincRNA.26883	NONHSAG114967.1
GPM6B-GEMIN8	lincRNA.26874	NONHSAG103289.1
HDX-APOOL	lincRNA.27382	NONHSAG104296.1
HTR1F-CGGBP1	lincRNA.1646	NONHSAG085615.1
IRX3-IRX5	lincRNA.6986	NONHSAG072171.1
ITPKB-PSEN2	lincRNA.5054	NONHSAG004485.3
JAG1-BTBD3	lincRNA.5725	NONHSAG031261.2
JAK1-AK4	lincRNA.578	NONHSAG057848.1
KCNN3-PMVK	lincRNA.1240	NONHSAG003028.2
KCNRG-DLEU7	lincRNA.2867	NONHSAT033787.2
KLF12-TBC1D4	lincRNA.3081	NONHSAG013764.2
LBP-RALGAPB	lincRNA.6505	NONHSAG081503.1
LRRC74A-IRF2BPL	lincRNA.25280	NONHSAG015526.2
MAP2K4-MYOCD	lincRNA.3942	NONHSAG020845.2
MEF2D-IQGAP3	lincRNA.1316	NONHSAT152395.1
MEIS3-SLC8A2	lincRNA.7671	NONHSAG026120.2
MEOX2-ISPD	lincRNA.21108	NONHSAT211706.1
METTL26-MCRIP2	lincRNA.16631	NONHSAG018190.2
MKL2-PARN	lincRNA.16879	NONHSAG018664.2
MORC2-SMTN	lincRNA.10112	NONHSAT084824.2
NDUFV3-PKNOX1	lincRNA.2543	NONHSAT082358.2
NOX5-GLCE	lincRNA.24377	NONHSAG070828.1
NUDT14-BRF1	lincRNA.10991	NONHSAG016091.2
PAK5-ANKEF1	lincRNA.5695	NONHSAT078565.2
PATL2-B2M	lincRNA.25383	NONHSAG108019.1
PHTF1-RSBN1	lincRNA.972	NONHSAG002471.2
PIK3R5-NTN1	lincRNA.3918	NONHSAT145573.2
PUM3-RFX3	lincRNA.12541	NONHSAG051650.2
PYGL-TRIM9	lincRNA.24748	NONHSAG014932.2
RDH8-C19orf66	lincRNA.22314	NONHSAG024762.2
RGS4-RGS5	lincRNA.1456	NONHSAG059540.1
RPRD1B-TGM2	lincRNA.6482	NONHSAT243332.1
SAMHD1-RBL1	lincRNA.6464	NONHSAG081493.1
SCAF8-TIAM2	lincRNA.25882	NONHSAG045207.2
SCGB1A1-AHNAK	lincRNA.15216	NONHSAT230468.1
SEC31A-THAP9	lincRNA.23924	NONHSAG038328.2
SETBP1-SLC14A2	lincRNA.16443	NONHSAG074767.1
SIX1-SIX4	lincRNA.25066	NONHSAG015159.3
SLC25A53-FAM199X	lincRNA.27816	NONHSAG055055.2
SLCO6A1-PAM	lincRNA.23328	NONHSAT103027.2
SLITRK5-GPC5	lincRNA.3133	NONHSAG107402.1
SMARCA2-VLDLR	lincRNA.12535	NONHSAG102435.1
SMIM14-UBE2K	lincRNA.23696	NONHSAT096092.2
SRC-BLCAP	lincRNA.6473	NONHSAG031729.2
TAF3-GATA3	lincRNA.5783	NONHSAG005175.2
TBC1D5-SATB1	lincRNA.2692	NONHSAG085375.1
TCF20-NFAM1	lincRNA.20818	NONHSAG084015.1
TET1-CCAR1	lincRNA.17714	NONHSAG006084.2
TP53TG5-DBNDD2	lincRNA.6561	NONHSAG031861.2
TXNL1-WDR7	lincRNA.16531	NONHSAG075206.1
USP2-THY1	lincRNA.8365	NONHSAG063684.1
ZMIZ1-PPIF	lincRNA.17853	NONHSAG006322.2
ZNF35-ZNF502	lincRNA.11220	NONHSAG034919.2
ZNF404-ZNF45	lincRNA.7550	NONHSAT180454.1
ZSCAN2-WDR73	lincRNA.10436	NONHSAT235562.1

## Sheet: Novel lincRNA vs Chicken
Supplementary File S4. Results of syntenic analysis of novel lincRNAs against different species.
Left-Right_Genes	Novel lincRNA	Chicken_lincRNA
ADCY5-HACD2	lincRNA.1877	NONGGAG005027.2
ADTRP-TMEM170B	lincRNA.14677	NONGGAT013854.1
AGPS-NFE2L2	lincRNA.12977	NONGGAG004957.2
ANKRD1-PCGF5	lincRNA.15678	NONGGAG006592.2
CARD19-SUSD3	lincRNA.12068	NONGGAG001231.2
CCNE1-URI1	lincRNA.7198	NONGGAG007935.1
CLIC4-SRRM1	lincRNA.13859	NONGGAT005151.2
DCN-BTG1	lincRNA.19607	NONGGAG000180.2
ERCC4-MKL2	lincRNA.16882	NONGGAT002521.2
FAT3-CHORDC1	lincRNA.14834	NONGGAG007368.1
FGD3-BICD2	lincRNA.12065	NONGGAT002149.2
FOXO1-COG6	lincRNA.2890	NONGGAG007778.1
GADD45G-DIRAS2	lincRNA.12030	NONGGAG006832.2
GDAP1-PI15	lincRNA.26467	NONGGAT013968.1
GNAI1-PHTF2	lincRNA.21204	NONGGAG007400.1
HTR1E-SYNCRIP	lincRNA.25704	NONGGAG003696.2
KCNN3-PMVK	lincRNA.1240	NONGGAG006145.2
KCNRG-DLEU7	lincRNA.2867	NONGGAG007770.1
LPP-BCL6	lincRNA.2007	NONGGAG005393.2
MEOX2-ISPD	lincRNA.21108	NONGGAG008686.1
MFSD6-HIBCH	lincRNA.12873	NONGGAG004837.2
MKL2-PARN	lincRNA.16879	NONGGAG001461.2
NCOA7-HEY2	lincRNA.25474	NONGGAG009269.1
NUDT14-BRF1	lincRNA.10991	NONGGAG004577.2
PARD3-NRP1	lincRNA.5826	NONGGAG008378.1
PDS5B-N4BP2L1	lincRNA.2930	NONGGAG000784.2
PIK3R5-NTN1	lincRNA.3918	NONGGAG008282.1
RPP40-ECI2	lincRNA.14755	NONGGAG008776.1
RREB1-LY86	lincRNA.14727	NONGGAG002387.2
SCAF8-TIAM2	lincRNA.25882	NONGGAG003590.2
SMARCA2-VLDLR	lincRNA.12535	NONGGAT011780.2
TBC1D5-SATB1	lincRNA.2692	NONGGAG002242.2
TET1-CCAR1	lincRNA.17714	NONGGAG004700.2
ZNF516-TSHZ1	lincRNA.16164	NONGGAT014226.1
